# Supplementary material
Source: ML conference proceedings conference paper supplement (https://openreview.net/forum?id=GA3NBpzQ1x)

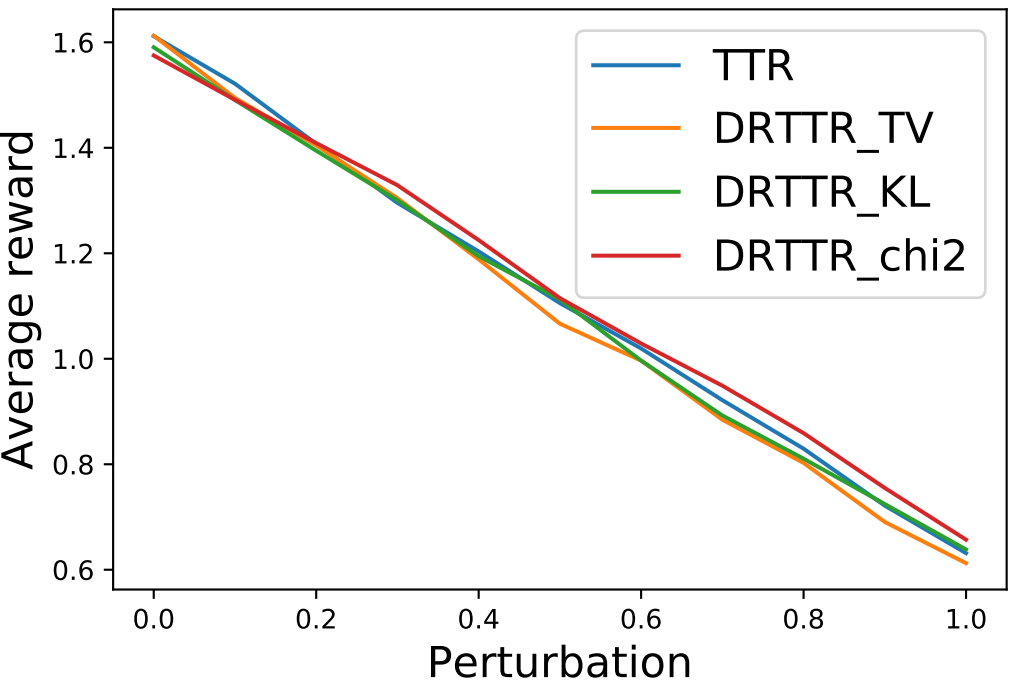

Supplement: supplementary_material [file robustness_0.3_0.2_0.35_5_10.pdf › Linear Mixture DRMDP/TTR/(0,1-p,p)/robustness_0.3_0.2_0.35_5_10.pdf]

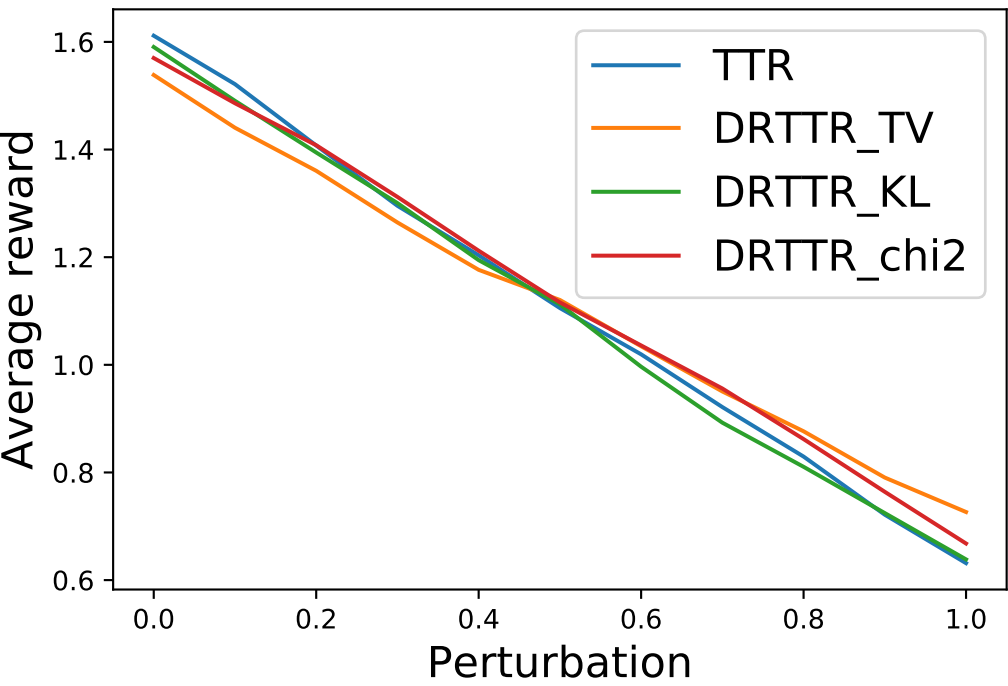

Supplement: supplementary_material [file robustness_0.3_0.2_0.7_10_20.pdf › Linear Mixture DRMDP/TTR/(0,1-p,p)/robustness_0.3_0.2_0.7_10_20.pdf]

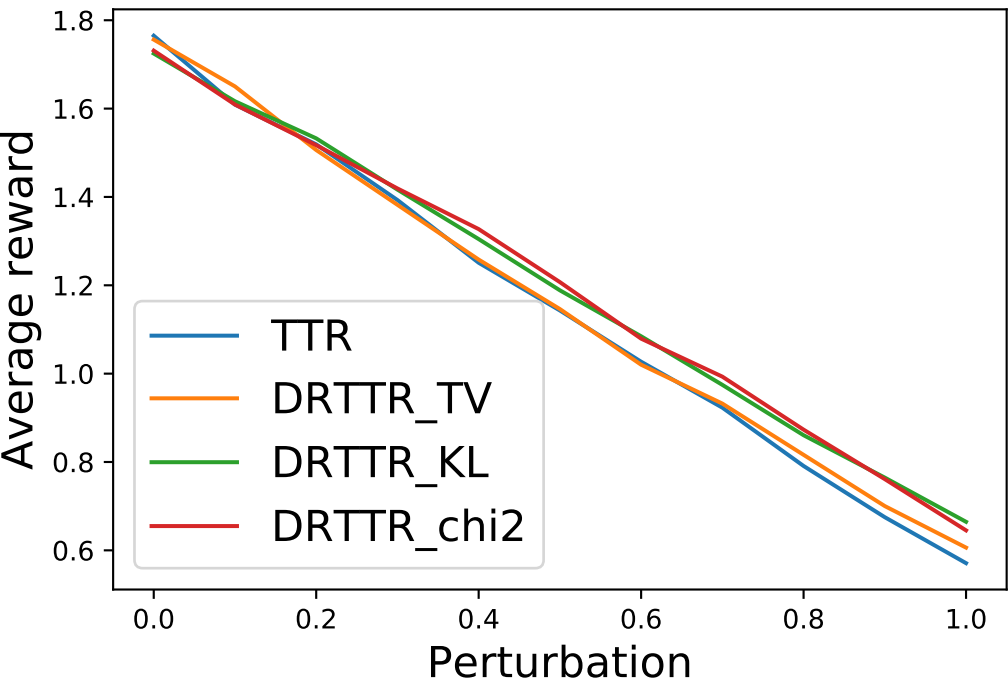

Supplement: supplementary_material [file robustness_0.3_0.3_0.35_5_10.pdf › Linear Mixture DRMDP/TTR/(0,1-p,p)/robustness_0.3_0.3_0.35_5_10.pdf]

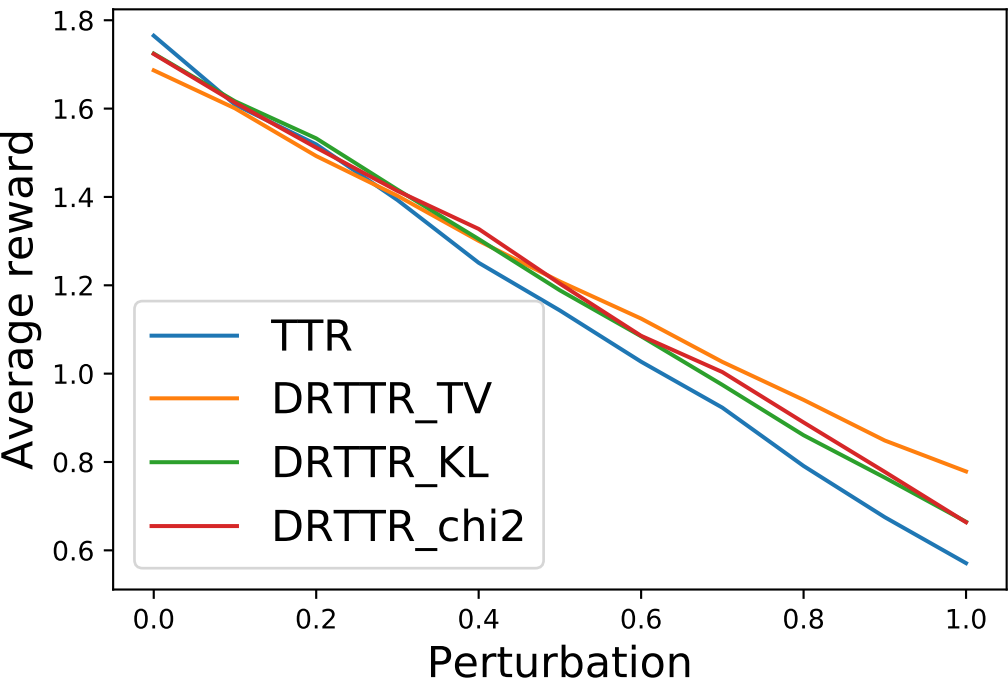

Supplement: supplementary_material [file robustness_0.3_0.3_0.7_10_20.pdf › Linear Mixture DRMDP/TTR/(0,1-p,p)/robustness_0.3_0.3_0.7_10_20.pdf]

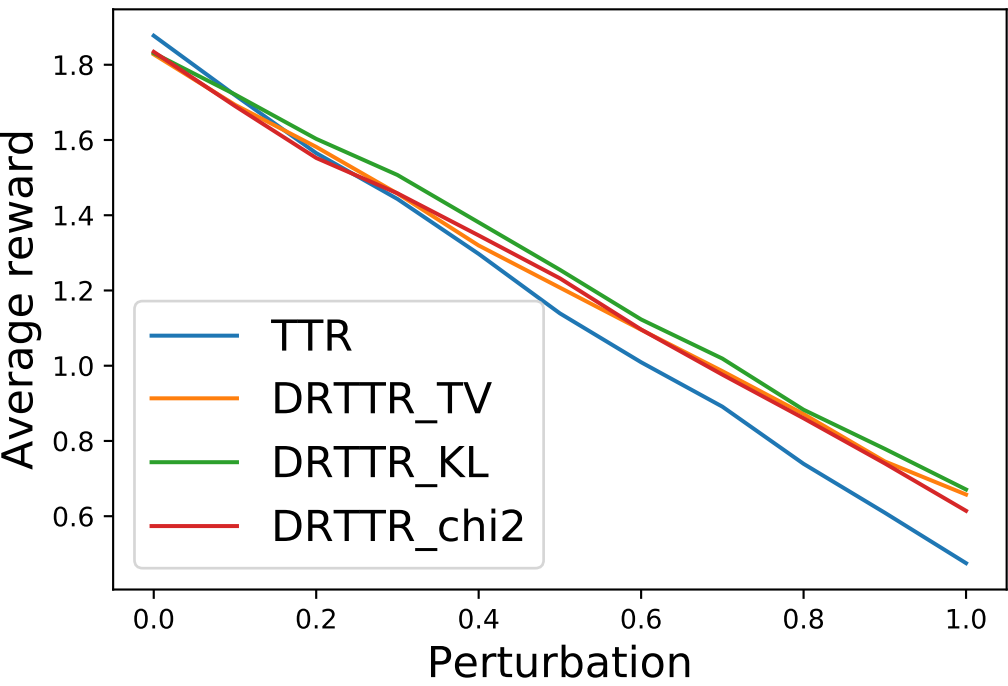

Supplement: supplementary_material [file robustness_0.4_0.3_0.35_5_10.pdf › Linear Mixture DRMDP/TTR/(0,1-p,p)/robustness_0.4_0.3_0.35_5_10.pdf]

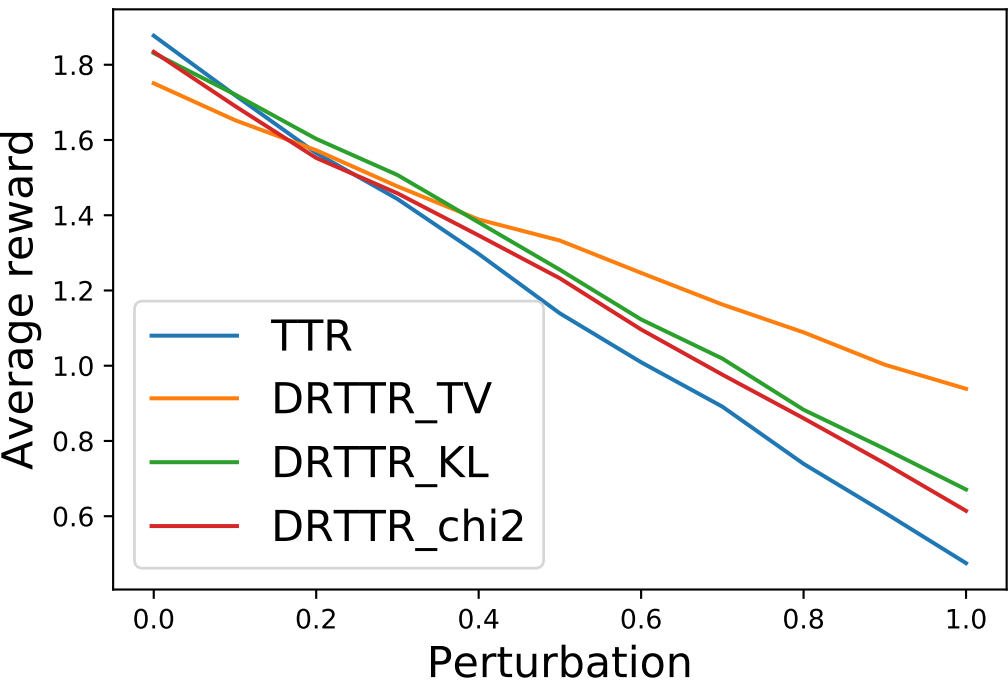

Supplement: supplementary_material [file robustness_0.4_0.3_0.7_10_20.pdf › Linear Mixture DRMDP/TTR/(0,1-p,p)/robustness_0.4_0.3_0.7_10_20.pdf]

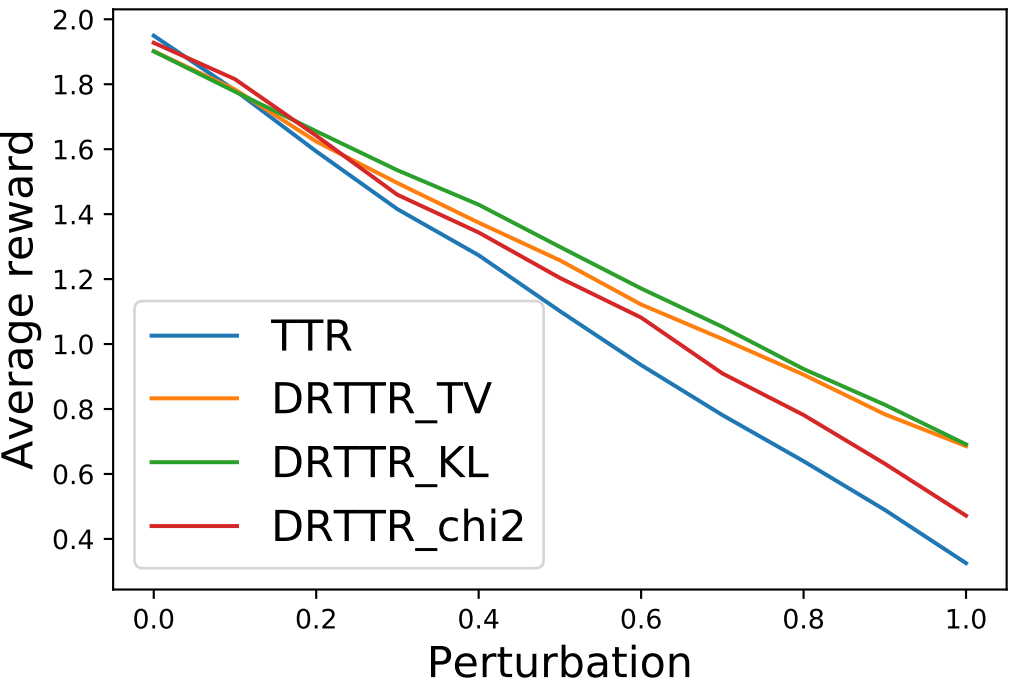

Supplement: supplementary_material [file robustness_0.4_0.4_0.35_5_10.pdf › Linear Mixture DRMDP/TTR/(0,1-p,p)/robustness_0.4_0.4_0.35_5_10.pdf]

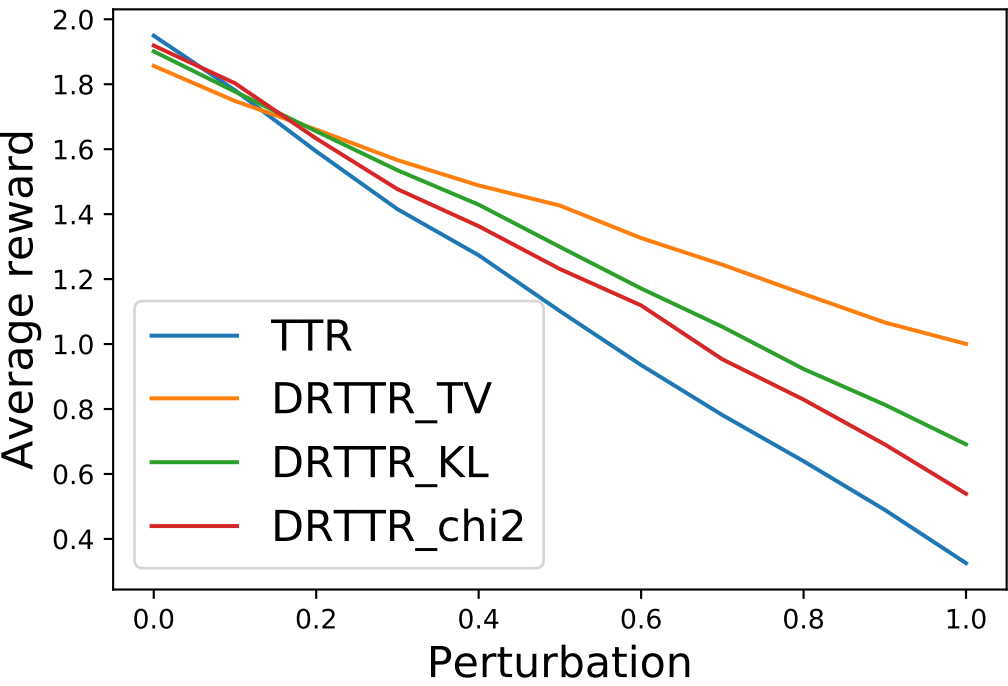

Supplement: supplementary_material [file robustness_0.4_0.4_0.7_10_20.pdf › Linear Mixture DRMDP/TTR/(0,1-p,p)/robustness_0.4_0.4_0.7_10_20.pdf]

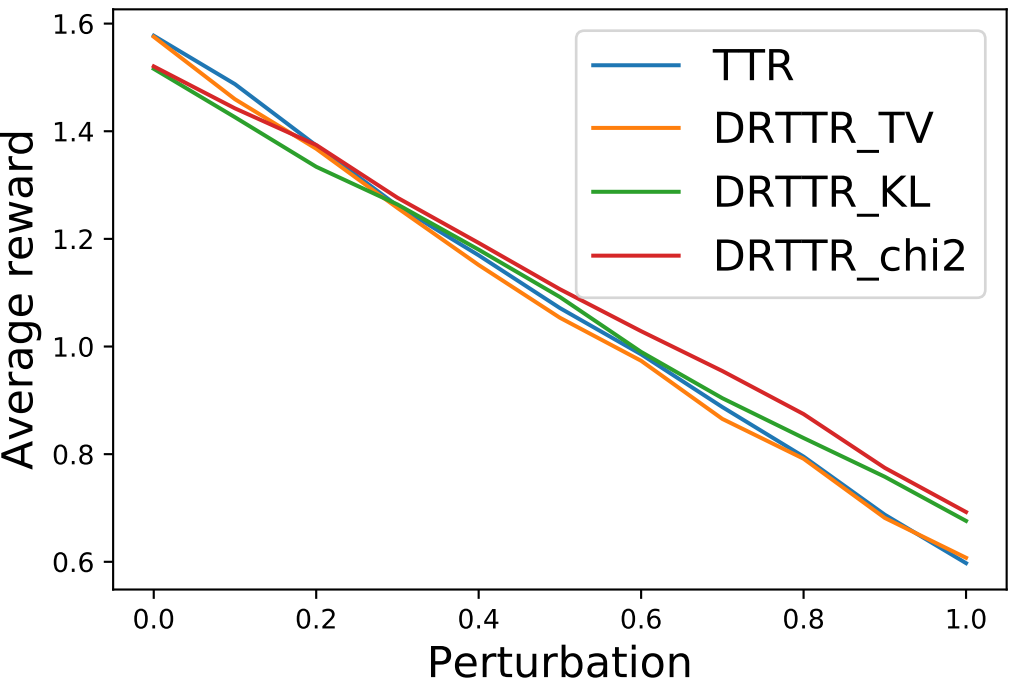

Supplement: supplementary_material [file robustness_0.3_0.2_0.35_5_10.pdf › Linear Mixture DRMDP/TTR/(p,1-2p,p)/robustness_0.3_0.2_0.35_5_10.pdf]

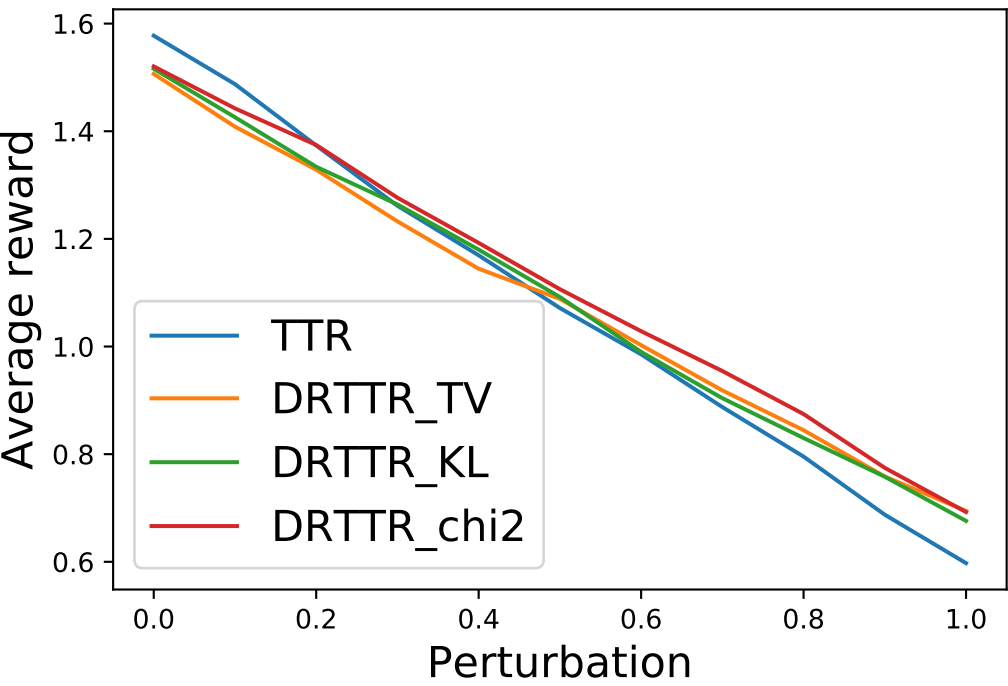

Supplement: supplementary_material [file robustness_0.3_0.2_0.7_10_20.pdf › Linear Mixture DRMDP/TTR/(p,1-2p,p)/robustness_0.3_0.2_0.7_10_20.pdf]

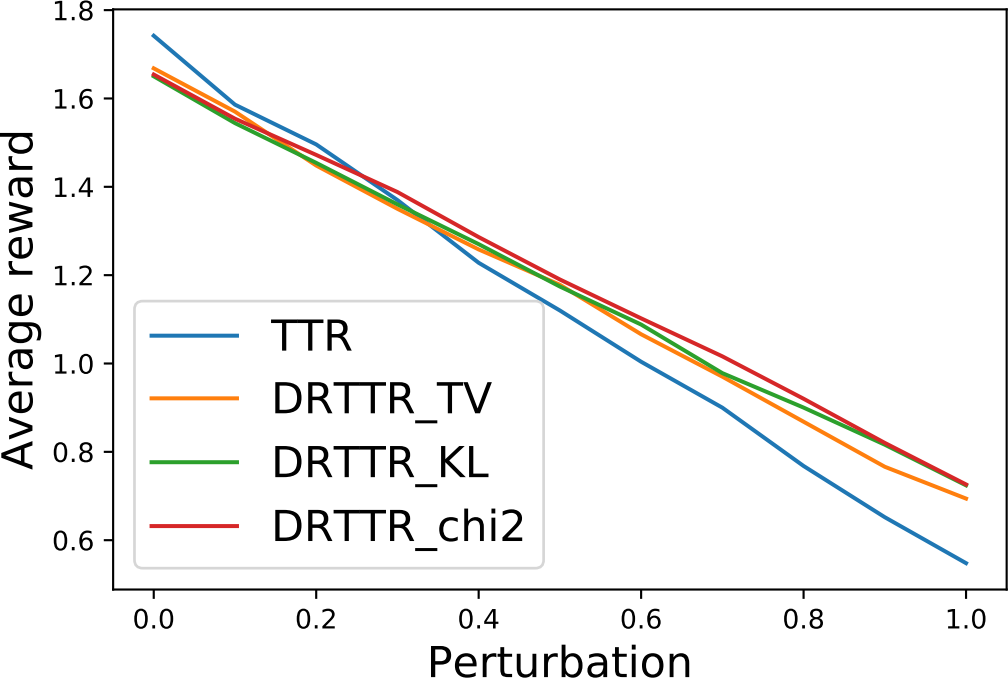

Supplement: supplementary_material [file robustness_0.3_0.3_0.35_5_10.pdf › Linear Mixture DRMDP/TTR/(p,1-2p,p)/robustness_0.3_0.3_0.35_5_10.pdf]

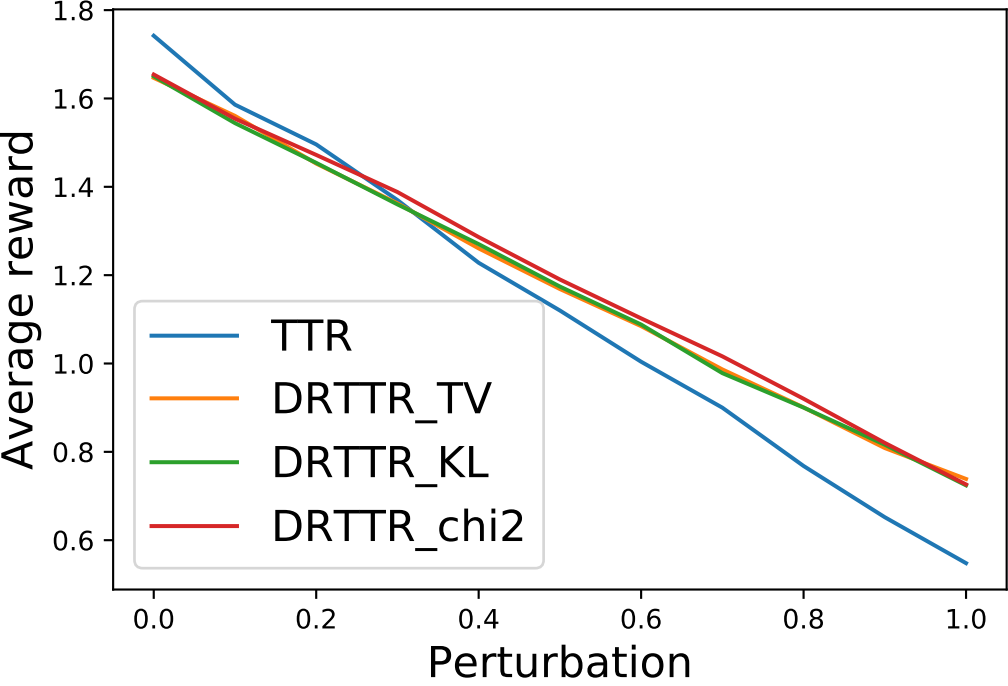

Supplement: supplementary_material [file robustness_0.3_0.3_0.7_10_20.pdf › Linear Mixture DRMDP/TTR/(p,1-2p,p)/robustness_0.3_0.3_0.7_10_20.pdf]

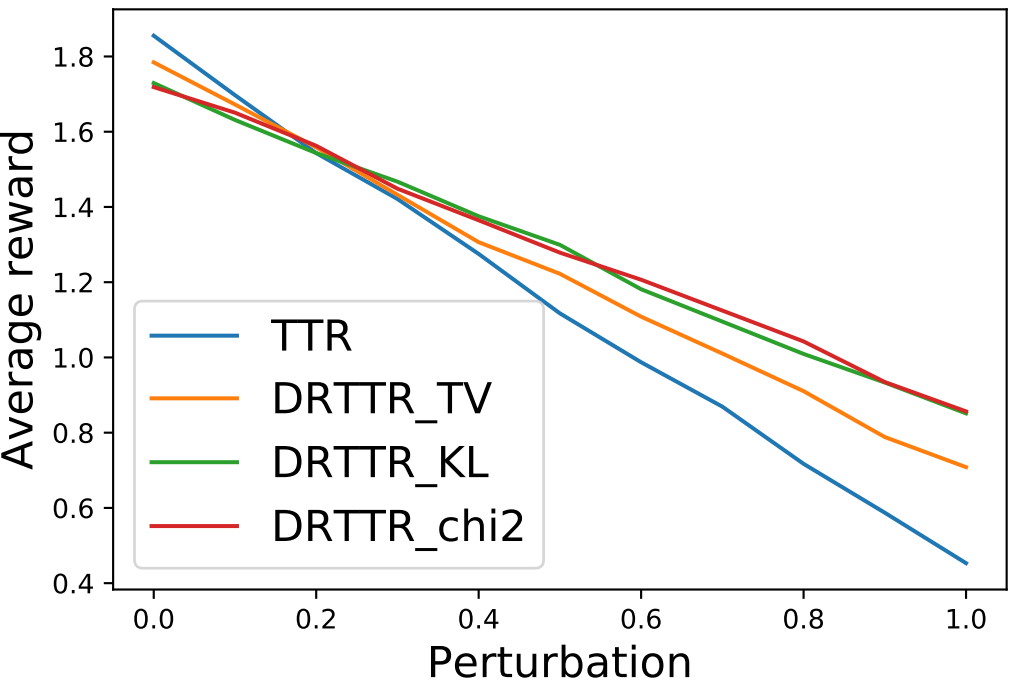

Supplement: supplementary_material [file robustness_0.4_0.3_0.35_5_10.pdf › Linear Mixture DRMDP/TTR/(p,1-2p,p)/robustness_0.4_0.3_0.35_5_10.pdf]

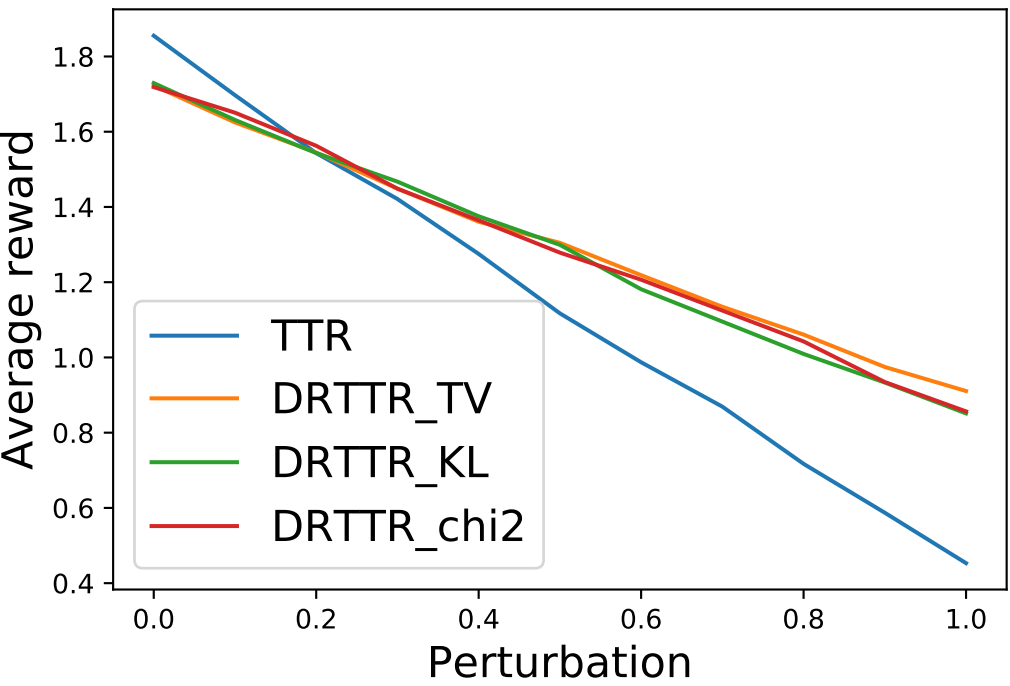

Supplement: supplementary_material [file robustness_0.4_0.3_0.7_10_20.pdf › Linear Mixture DRMDP/TTR/(p,1-2p,p)/robustness_0.4_0.3_0.7_10_20.pdf]

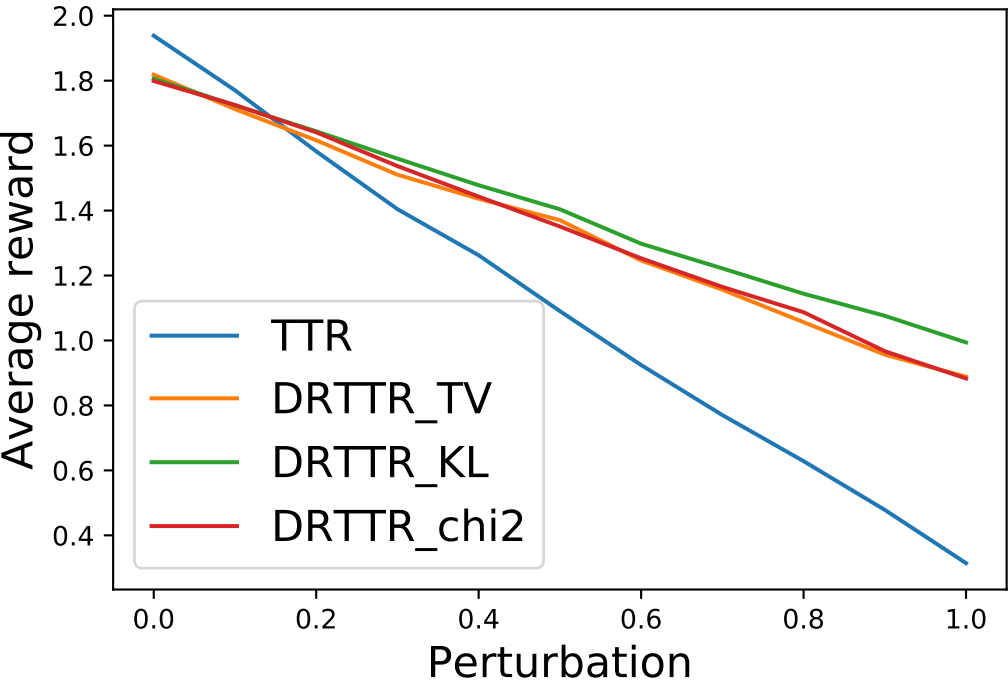

Supplement: supplementary_material [file robustness_0.4_0.4_0.35_5_10.pdf › Linear Mixture DRMDP/TTR/(p,1-2p,p)/robustness_0.4_0.4_0.35_5_10.pdf]

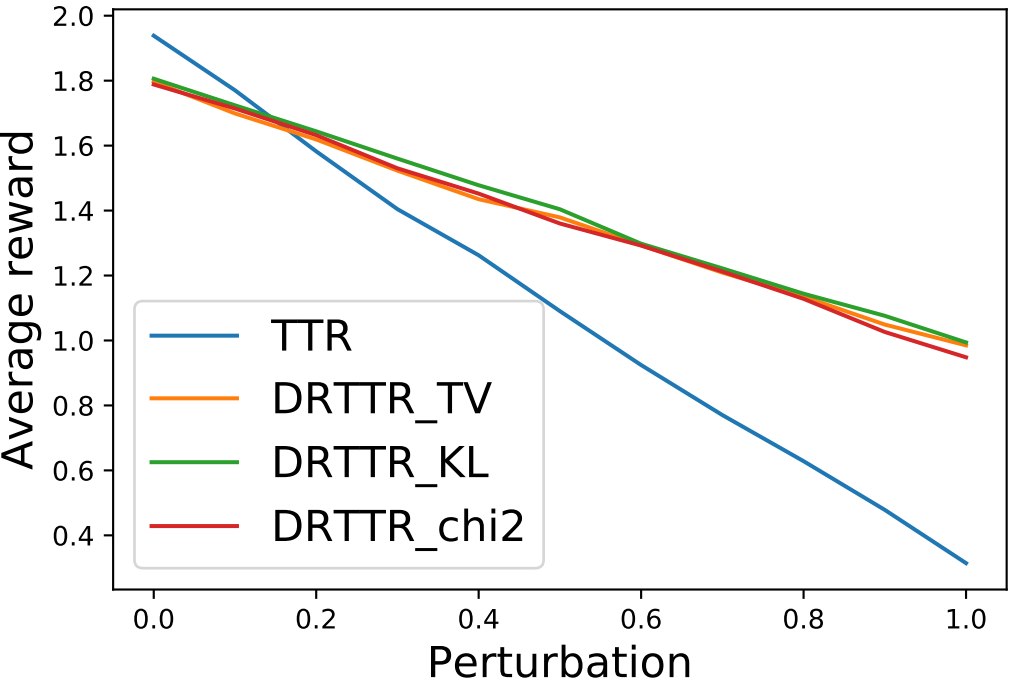

Supplement: supplementary_material [file robustness_0.4_0.4_0.7_10_20.pdf › Linear Mixture DRMDP/TTR/(p,1-2p,p)/robustness_0.4_0.4_0.7_10_20.pdf]

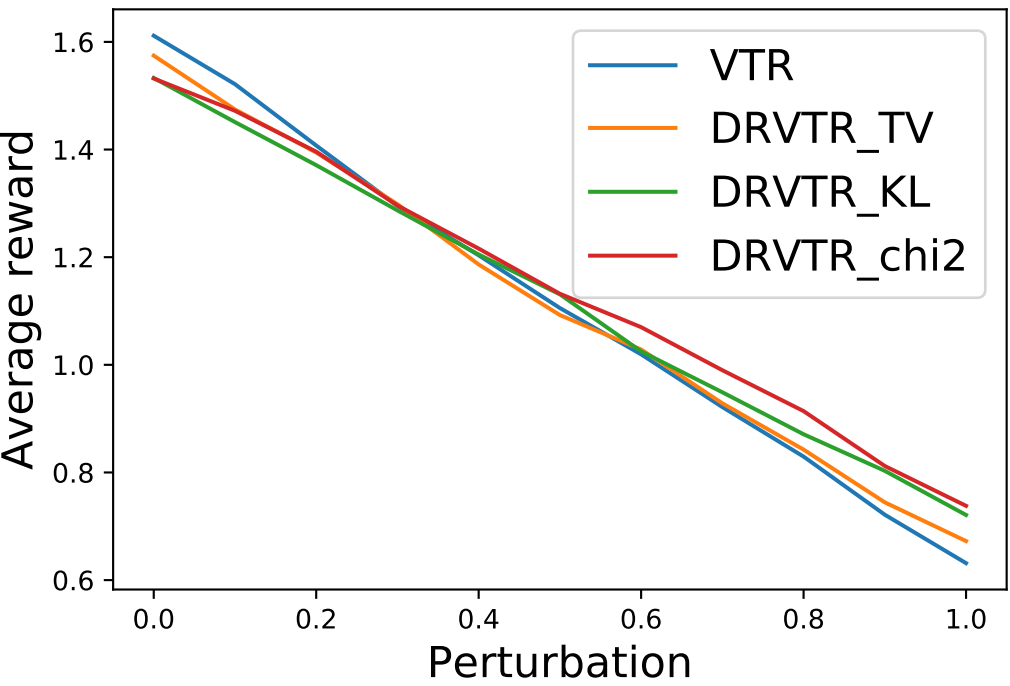

Supplement: supplementary_material [file robustness_0.3_0.2_0.35_5_10.pdf › Linear Mixture DRMDP/VTR/(0,1-p,p)/robustness_0.3_0.2_0.35_5_10.pdf]

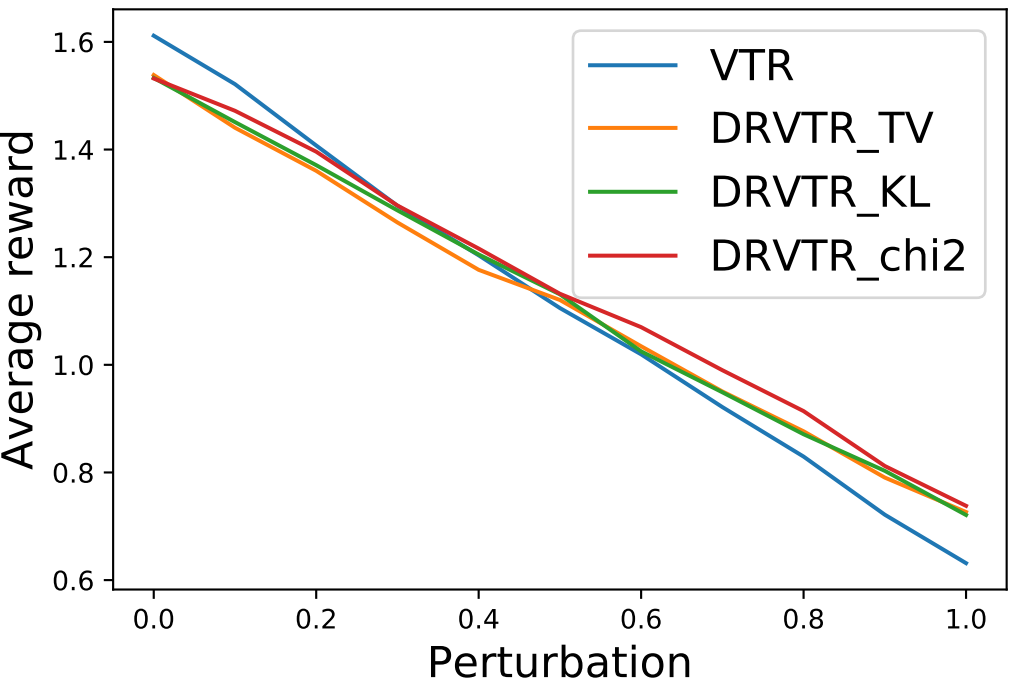

Supplement: supplementary_material [file robustness_0.3_0.2_0.7_10_20.pdf › Linear Mixture DRMDP/VTR/(0,1-p,p)/robustness_0.3_0.2_0.7_10_20.pdf]

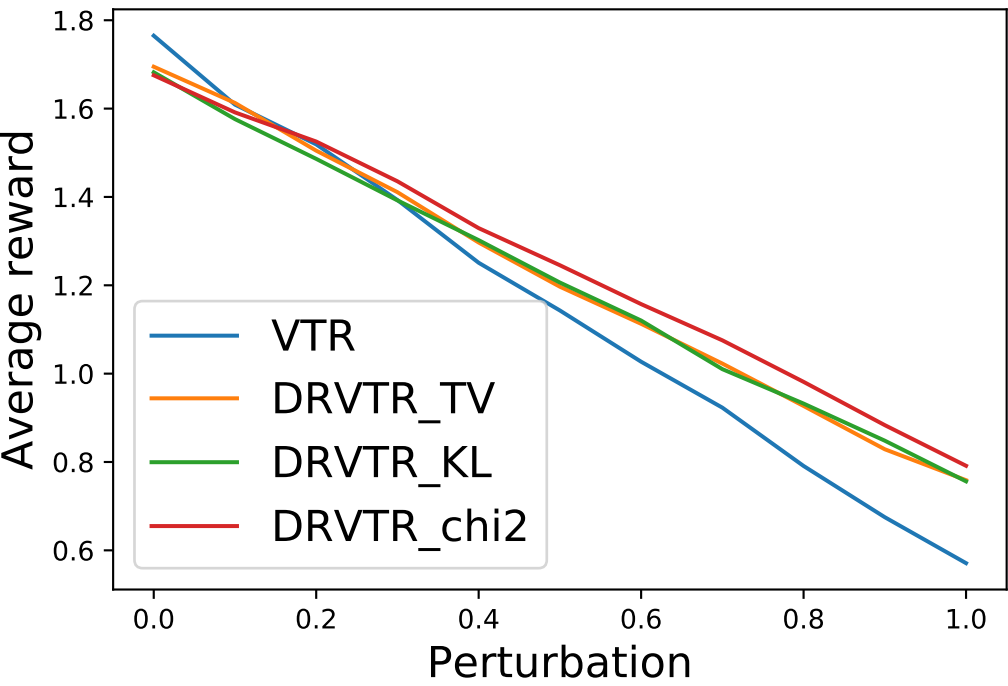

Supplement: supplementary_material [file robustness_0.3_0.3_0.35_5_10.pdf › Linear Mixture DRMDP/VTR/(0,1-p,p)/robustness_0.3_0.3_0.35_5_10.pdf]

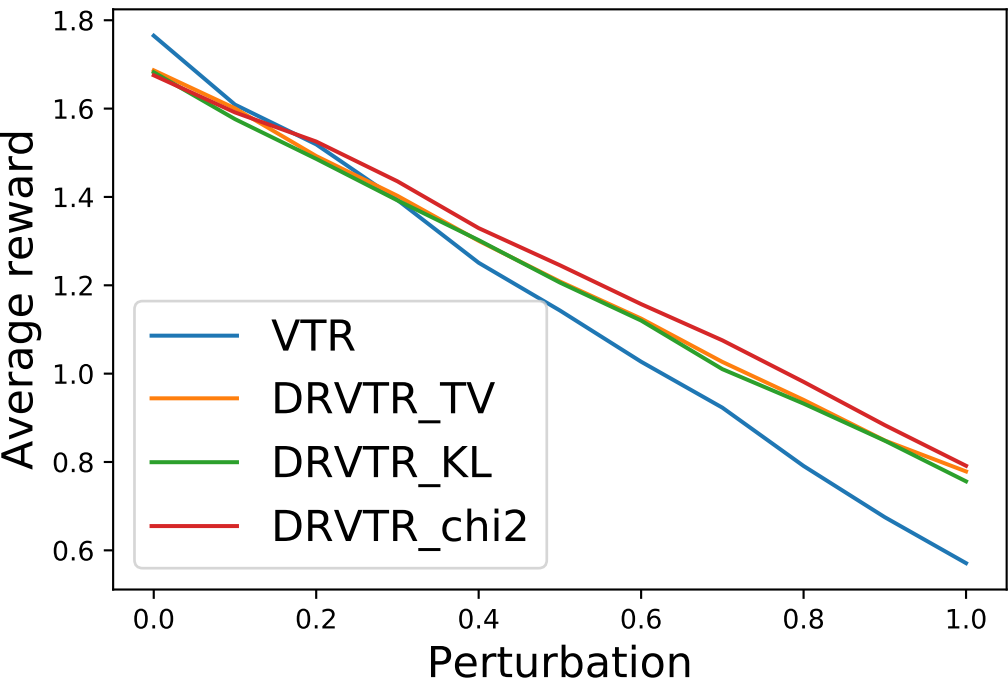

Supplement: supplementary_material [file robustness_0.3_0.3_0.7_10_20.pdf › Linear Mixture DRMDP/VTR/(0,1-p,p)/robustness_0.3_0.3_0.7_10_20.pdf]

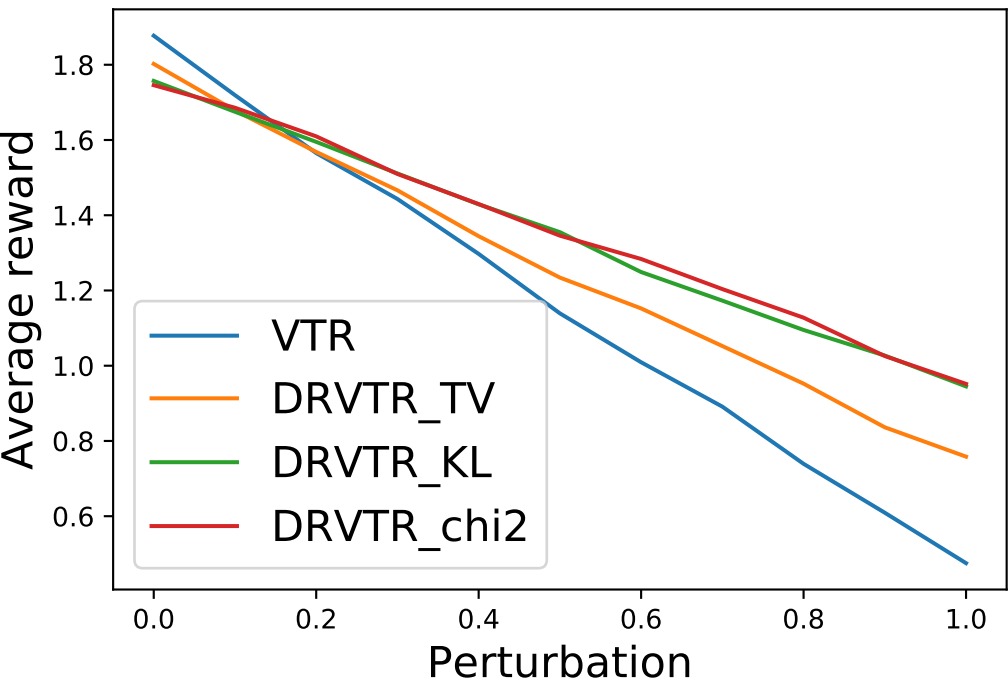

Supplement: supplementary_material [file robustness_0.4_0.3_0.35_5_10.pdf › Linear Mixture DRMDP/VTR/(0,1-p,p)/robustness_0.4_0.3_0.35_5_10.pdf]

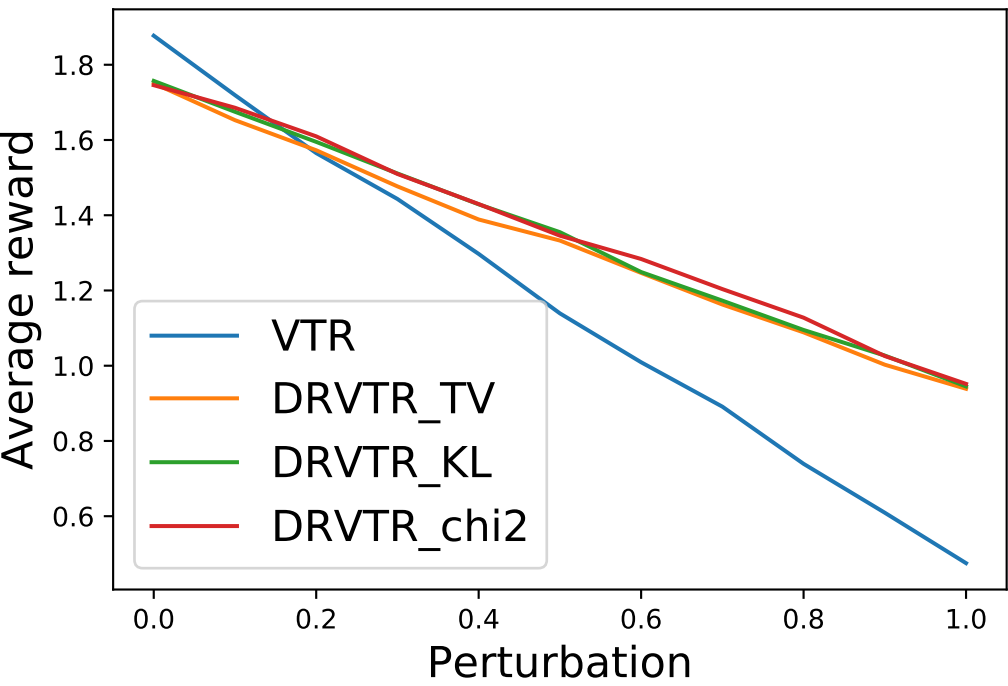

Supplement: supplementary_material [file robustness_0.4_0.3_0.7_10_20.pdf › Linear Mixture DRMDP/VTR/(0,1-p,p)/robustness_0.4_0.3_0.7_10_20.pdf]

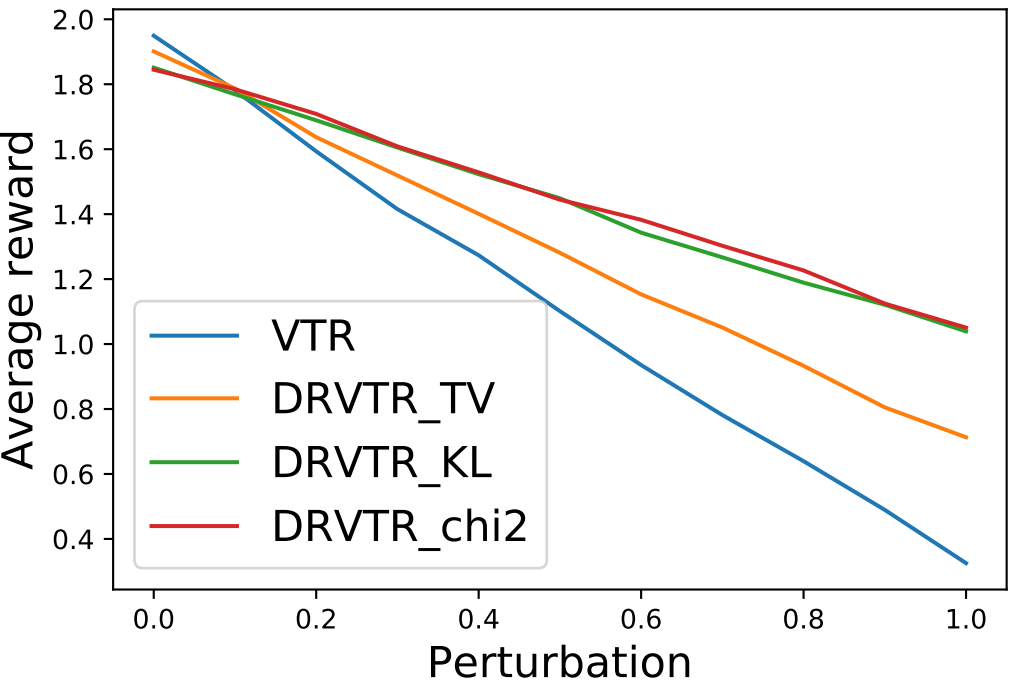

Supplement: supplementary_material [file robustness_0.4_0.4_0.35_5_10.pdf › Linear Mixture DRMDP/VTR/(0,1-p,p)/robustness_0.4_0.4_0.35_5_10.pdf]

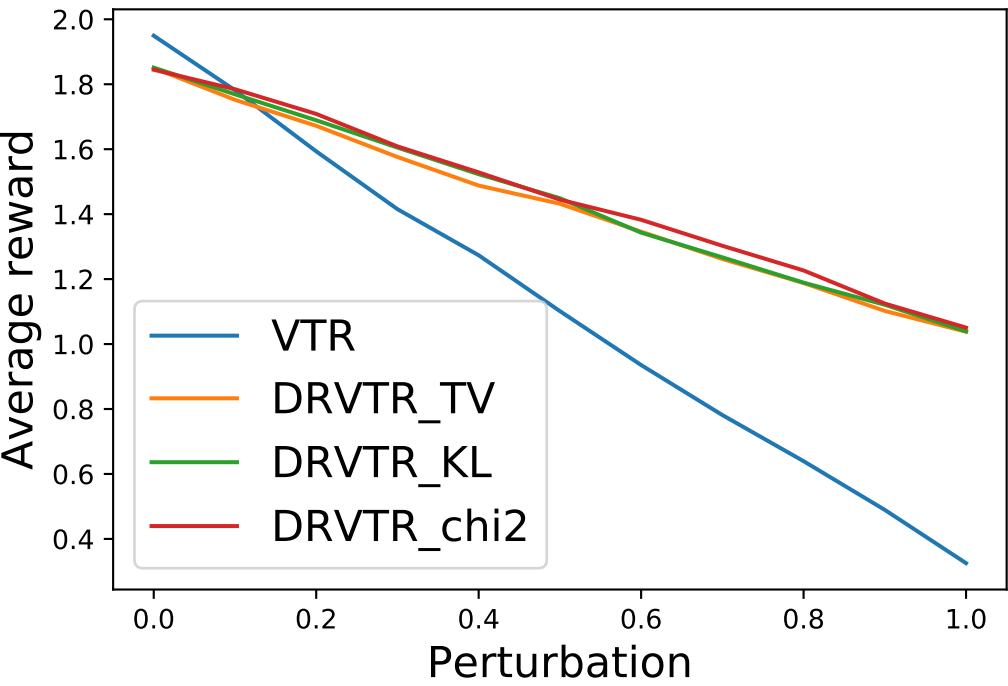

Supplement: supplementary_material [file robustness_0.4_0.4_0.7_10_20.pdf › Linear Mixture DRMDP/VTR/(0,1-p,p)/robustness_0.4_0.4_0.7_10_20.pdf]

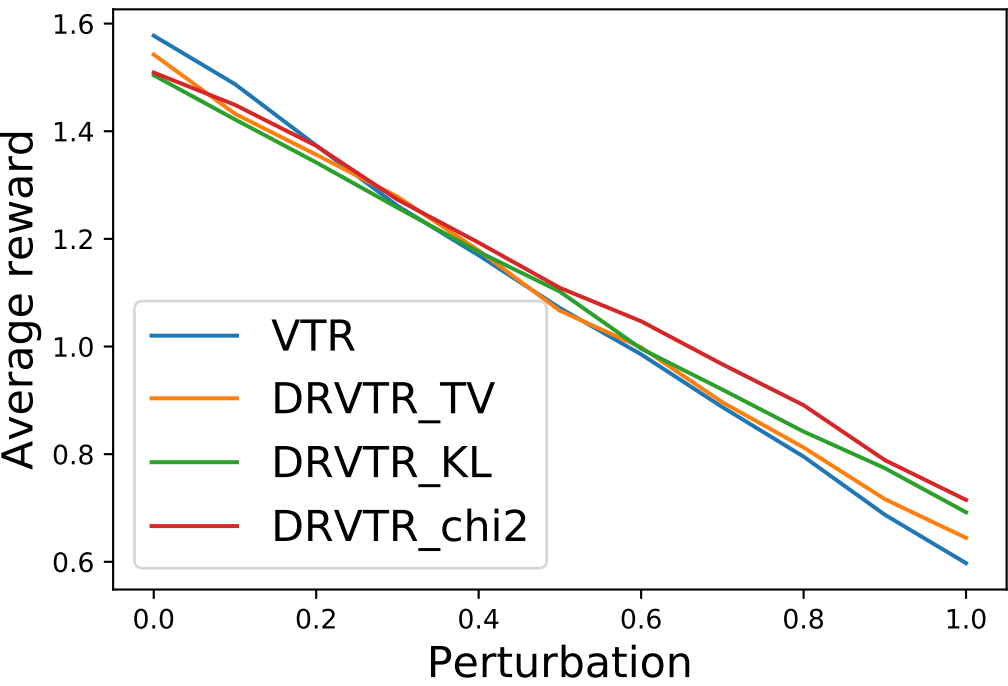

Supplement: supplementary_material [file robustness_0.3_0.2_0.35_5_10.pdf › Linear Mixture DRMDP/VTR/(p,1-2p,p)/robustness_0.3_0.2_0.35_5_10.pdf]

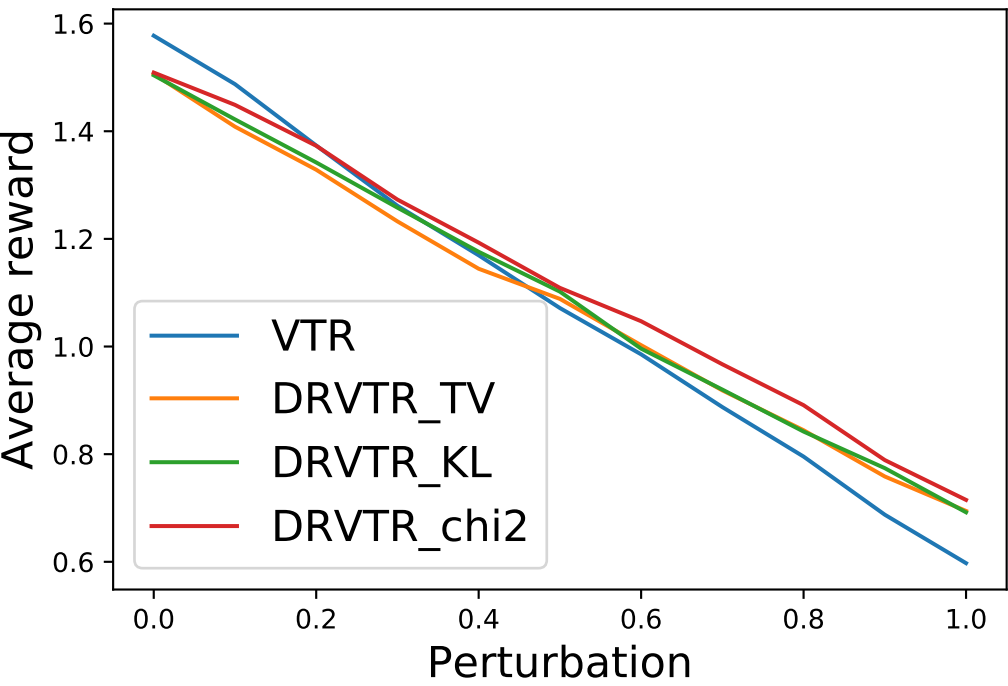

Supplement: supplementary_material [file robustness_0.3_0.2_0.7_10_20.pdf › Linear Mixture DRMDP/VTR/(p,1-2p,p)/robustness_0.3_0.2_0.7_10_20.pdf]

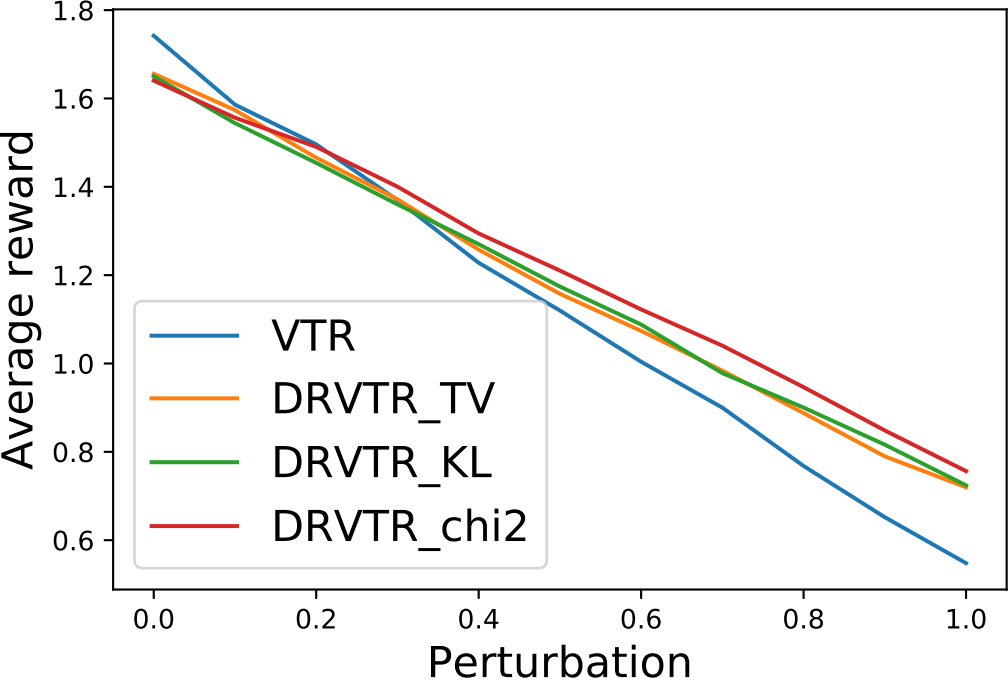

Supplement: supplementary_material [file robustness_0.3_0.3_0.35_5_10.pdf › Linear Mixture DRMDP/VTR/(p,1-2p,p)/robustness_0.3_0.3_0.35_5_10.pdf]

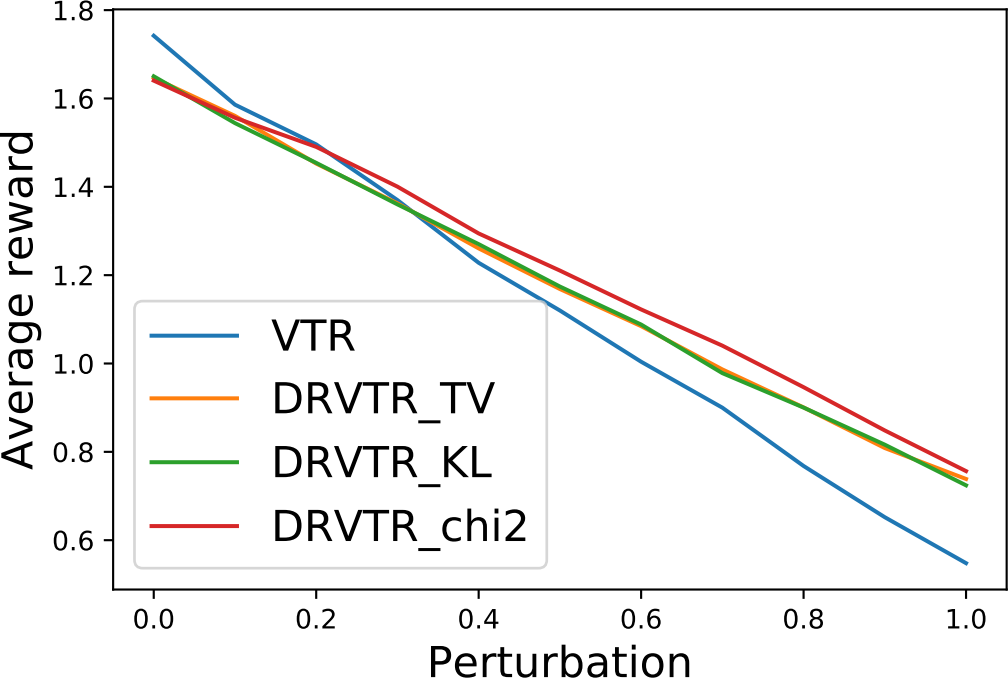

Supplement: supplementary_material [file robustness_0.3_0.3_0.7_10_20.pdf › Linear Mixture DRMDP/VTR/(p,1-2p,p)/robustness_0.3_0.3_0.7_10_20.pdf]

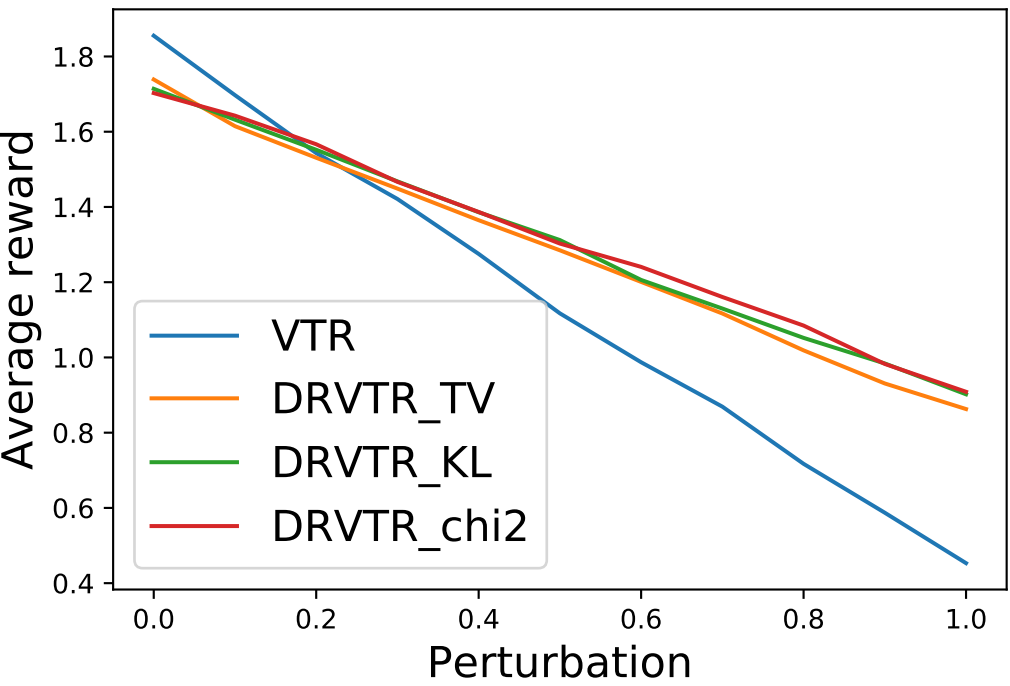

Supplement: supplementary_material [file robustness_0.4_0.3_0.35_5_10.pdf › Linear Mixture DRMDP/VTR/(p,1-2p,p)/robustness_0.4_0.3_0.35_5_10.pdf]

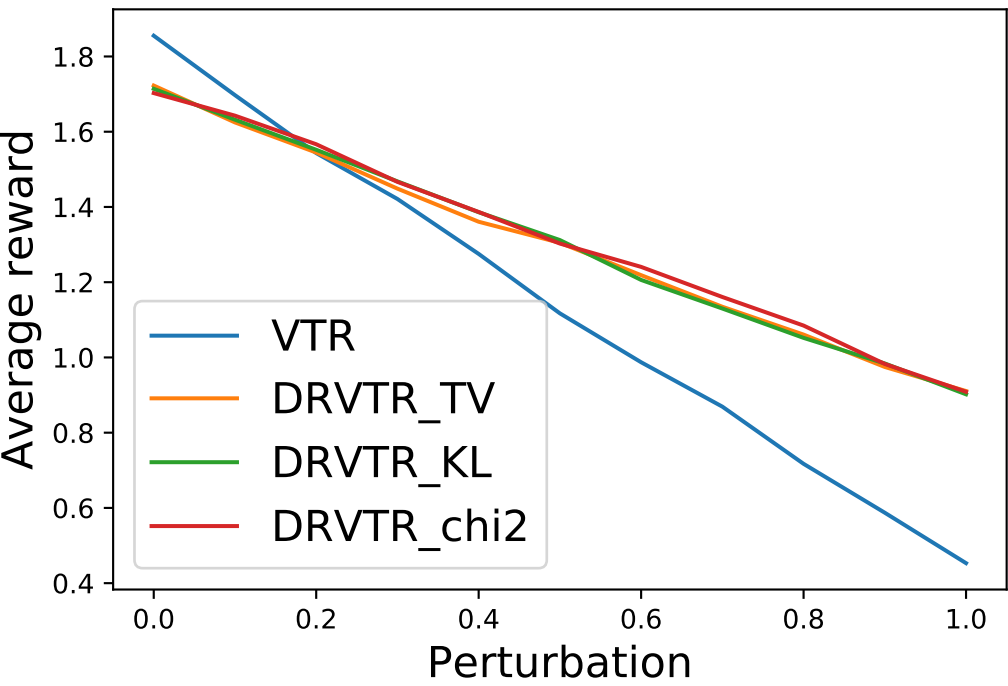

Supplement: supplementary_material [file robustness_0.4_0.3_0.7_10_20.pdf › Linear Mixture DRMDP/VTR/(p,1-2p,p)/robustness_0.4_0.3_0.7_10_20.pdf]

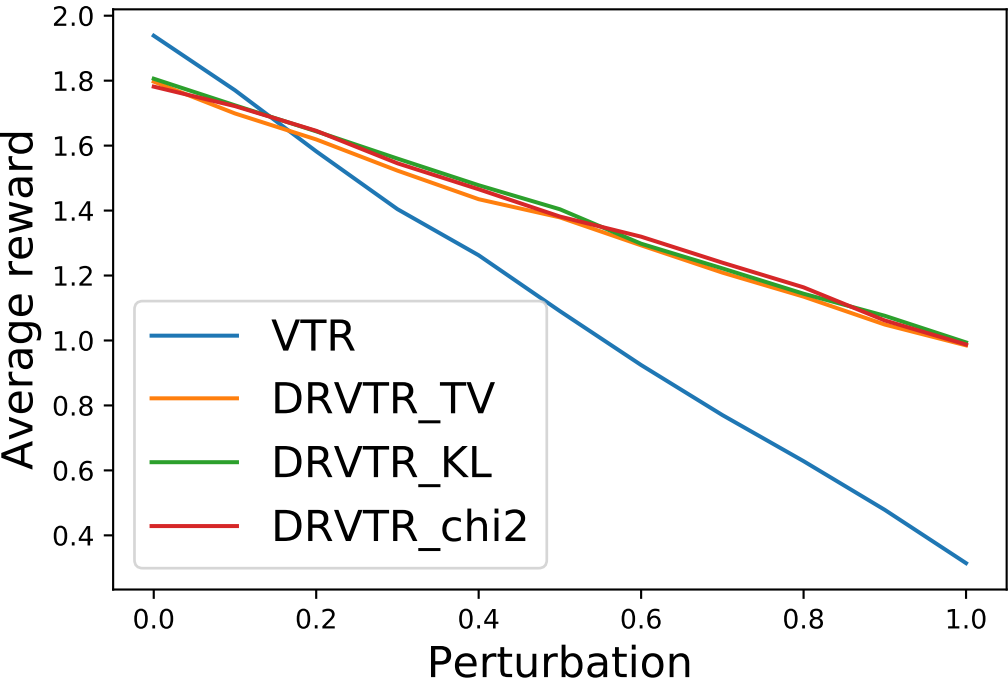

Supplement: supplementary_material [file robustness_0.4_0.4_0.35_5_10.pdf › Linear Mixture DRMDP/VTR/(p,1-2p,p)/robustness_0.4_0.4_0.35_5_10.pdf]



Supplement: supplementary_material [file robustness_0.4_0.4_0.7_10_20.pdf › Linear Mixture DRMDP/VTR/(p,1-2p,p)/robustness_0.4_0.4_0.7_10_20.pdf]
